# Supplementary material for: Qualitative exploration of patient flow in a Caribbean emergency department
Source: HighWire-hosted journal article supplement (doi:10.1136/bmjopen-2020-041422), 2020-12-01
Supplement: bmjopen-2020-041422supp003_data_supplement.pdf [file bmjopen-2020-041422supp003_data_supplement.pdf]

## Supplementary File 3

Table S2. Summary of main changes to ED layout

| <b>Original ED layout</b>                                                                                                                                      | <b>New ED layout</b>                                                                                                                                                                                          |
|----------------------------------------------------------------------------------------------------------------------------------------------------------------|---------------------------------------------------------------------------------------------------------------------------------------------------------------------------------------------------------------|
| Arrival and registration                                                                                                                                       | Arrival and registration                                                                                                                                                                                      |
| Level 5 area                                                                                                                                                   | Level 5 area                                                                                                                                                                                                  |
| Level 1-3 area <ul style="list-style-type: none"><li>• Examination room 1</li><li>• Examination room 2</li><li>• Waiting room for Level 1-3 patients</li></ul> | Level 1-3 area <ul style="list-style-type: none"><li>• Dedicated examination room for ambulatory patients</li><li>• Waiting room for Level 1-3 patients</li><li>• Waiting room for Level 4 patients</li></ul> |
| Level 4 area                                                                                                                                                   | Holding bay for admitted/referred patients                                                                                                                                                                    |
| Minor operating theatre <ul style="list-style-type: none"><li>• Non-sterile room</li></ul>                                                                     | Minor operating theatre <ul style="list-style-type: none"><li>• Holding bay for admitted/referred patients</li></ul>                                                                                          |
| Observation ward                                                                                                                                               | Observation ward                                                                                                                                                                                              |
